# Supplementary material for: A Systematic Design Optimization Approach for Multiphysics MEMS Devices Based on Combined Computer Experiments and Gaussian Process Modelling
Source: MDPI journal article supplement (doi:10.3390/s21217242), 2021-10-30
Supplement: s1 [file s1]

**Table S1:** LHS based design matrix for the eight design parameters and corresponding five output responses obtained through FEM simulations

| Run # | Input Factors  |                |                |                |                |                |                |                | Output Responses |                |                |                |                |
|-------|----------------|----------------|----------------|----------------|----------------|----------------|----------------|----------------|------------------|----------------|----------------|----------------|----------------|
|       | X <sub>1</sub> | X <sub>2</sub> | X <sub>3</sub> | X <sub>4</sub> | X <sub>5</sub> | X <sub>6</sub> | X <sub>7</sub> | X <sub>8</sub> | Y <sub>1</sub>   | Y <sub>2</sub> | Y <sub>3</sub> | Y <sub>4</sub> | Y <sub>5</sub> |
| 1     | 243.67         | 431.65         | 443.04         | 6.1519         | 24.0886        | 250.87         | 651.39         | 0.2519         | 3339.049         | 0.5869         | 5.2525         | 676            | 0.9224         |
| 2     | 165.19         | 436.71         | 484.81         | 6.2532         | 11.0253        | 351.88         | 492.66         | 0.4494         | 3089.005         | 0.3678         | 6.4647         | 297            | 0.8563         |
| 3     | 153.8          | 430.38         | 406.33         | 7.519          | 22.5696        | 296.95         | 484.3          | 0.4038         | 5134.294         | 0.2561         | 12.3232        | 238            | 0.7657         |
| 4     | 171.52         | 440.51         | 403.8          | 6.1772         | 10.4177        | 265.05         | 459.24         | 0.1911         | 3834.470         | 0.1850         | 8.0808         | 145            | 0.7643         |
| 5     | 229.75         | 462.03         | 412.66         | 7.5443         | 5.2532         | 348.34         | 216.96         | 0.2367         | 4941.468         | 0.0572         | 9.0452         | 58             | 0.8650         |
| 6     | 213.29         | 411.39         | 418.99         | 7.3671         | 24.3924        | 355.43         | 233.67         | 0.2114         | 4760.820         | 0.2830         | 9.2462         | 275            | 0.8547         |
| 7     | 170.25         | 470.89         | 473.42         | 6.9367         | 1.3038         | 328.85         | 200.25         | 0.3025         | 3666.030         | 0.0269         | 7.8788         | 21             | 0.7145         |
| 8     | 176.58         | 449.37         | 415.19         | 7.6203         | 20.7468        | 240.24         | 275.44         | 0.1759         | 5040.583         | 0.2111         | 11.1111        | 164            | 0.6884         |
| 9     | 220.89         | 478.48         | 478.48         | 6.6076         | 20.443         | 279.23         | 384.05         | 0.4646         | 3323.169         | 0.6033         | 5.6566         | 659            | 0.8658         |
| 10    | 166.46         | 448.1          | 410.13         | 6.3797         | 9.2025         | 364.29         | 609.62         | 0.3785         | 3936.985         | 0.1744         | 8.4828         | 137            | 0.8957         |
| 11    | 185.44         | 408.86         | 405.06         | 7.1392         | 5.8608         | 298.72         | 175.19         | 0.262          | 4775.983         | 0.0692         | 10.9900        | 59             | 0.6954         |
| 12    | 157.59         | 424.05         | 483.54         | 6.6835         | 3.1266         | 249.1          | 392.41         | 0.419          | 3447.658         | 0.0806         | 7.6768         | 61             | 0.6985         |
| 13    | 167.72         | 484.81         | 444.3          | 7.9747         | 15.5823        | 309.35         | 208.61         | 0.3532         | 4889.015         | 0.1866         | 11.1111        | 151            | 0.6998         |
| 14    | 223.42         | 418.99         | 481.01         | 6.0253         | 13.4557        | 254.42         | 242.03         | 0.3937         | 2943.098         | 0.4716         | 4.8485         | 495            | 0.7732         |
| 15    | 201.9          | 421.52         | 489.87         | 6.9114         | 14.9747        | 233.15         | 693.16         | 0.3633         | 3542.686         | 0.3482         | 6.6667         | 326            | 0.8163         |
| 16    | 194.3          | 481.01         | 440.51         | 7.1139         | 9.5063         | 358.97         | 367.34         | 0.4949         | 4153.039         | 0.1842         | 8.2828         | 177            | 0.8962         |
| 17    | 247.47         | 468.35         | 488.61         | 6.0759         | 4.3418         | 316.44         | 150.13         | 0.338          | 2850.170         | 0.1553         | 4.2424         | 179            | 0.7862         |
| 18    | 199.37         | 489.87         | 400            | 7.2911         | 7.0759         | 275.68         | 509.37         | 0.2013         | 4893.874         | 0.0773         | 9.6981         | 69             | 0.8489         |
| 19    | 187.97         | 460.76         | 454.43         | 6.8354         | 4.038          | 305.81         | 743.29         | 0.4696         | 3782.419         | 0.0915         | 7.4748         | 82             | 0.8971         |
| 20    | 182.91         | 483.54         | 431.65         | 7.8734         | 14.3671        | 318.21         | 718.23         | 0.3582         | 4972.935         | 0.1672         | 10.6533        | 140            | 0.8984         |
| 21    | 198.1          | 425.32         | 402.53         | 7.1646         | 21.0506        | 295.18         | 709.87         | 0.1253         | 4804.986         | 0.2324         | 9.6970         | 203            | 0.8673         |
| 22    | 158.86         | 467.09         | 467.09         | 7.4177         | 16.4937        | 257.96         | 534.43         | 0.4747         | 4137.657         | 0.3131         | 9.4950         | 234            | 0.7397         |
| 23    | 208.23         | 401.27         | 429.11         | 6.8101         | 17.1013        | 266.82         | 475.95         | 0.4797         | 4123.896         | 0.3296         | 7.8788         | 295            | 0.8483         |
| 24    | 195.57         | 422.78         | 474.68         | 6.962          | 24.6962        | 335.93         | 400.76         | 0.4443         | 3725.774         | 0.5617         | 7.2727         | 512            | 0.8868         |
| 25    | 212.03         | 420.25         | 422.78         | 7.9241         | 19.2278        | 362.52         | 551.14         | 0.4241         | 5231.738         | 0.2149         | 29.7487        | 204            | 0.9969         |
| 26    | 225.95         | 497.47         | 424.05         | 7.6456         | 7.9873         | 263.28         | 317.22         | 0.4848         | 4820.629         | 0.1102         | 8.8889         | 121            | 0.8289         |
| 27    | 152.53         | 455.7          | 449.37         | 6.2785         | 21.962         | 234.92         | 634.68         | 0.3177         | 3407.669         | 0.5311         | 7.6768         | 380            | 0.7067         |
| 28    | 181.65         | 463.29         | 426.58         | 6.2025         | 13.1519        | 236.69         | 342.28         | 0.4899         | 3556.548         | 0.3468         | 7.0707         | 304            | 0.7193         |
| 29    | 184.18         | 473.42         | 416.46         | 7.2405         | 15.2785        | 367.83         | 450.89         | 0.1658         | 4614.659         | 0.1851         | 9.6970         | 151            | 0.9104         |
| 30    | 206.96         | 465.82         | 463.29         | 7.8987         | 3.4304         | 353.66         | 542.78         | 0.2165         | 4555.234         | 0.0436         | 8.8889         | 40             | 0.9725         |
| 31    | 180.38         | 492.41         | 496.2          | 6.7089         | 8.5949         | 245.56         | 442.53         | 0.257          | 3252.619         | 0.2204         | 6.4647         | 178            | 0.7545         |
| 32    | 150            | 475.95         | 462.03         | 6.9873         | 23.7848        | 334.16         | 517.72         | 0.2975         | 3833.151         | 0.4468         | 8.8889         | 318            | 0.8029         |
| 33    | 238.61         | 454.43         | 417.72         | 6.5316         | 6.7722         | 337.71         | 684.81         | 0.2873         | 3920.651         | 0.1215         | 6.6667         | 129            | 1.0494         |
| 34    | 218.35         | 498.73         | 451.9          | 6.8861         | 13.7595        | 314.67         | 108.35         | 0.3076         | 3788.923         | 0.2678         | 6.8687         | 274            | 0.6656         |
| 35    | 222.15         | 427.85         | 425.32         | 7.5696         | 4.6456         | 261.5          | 668.1          | 0.1962         | 4826.271         | 0.0521         | 9.0909         | 51             | 0.8996         |
| 36    | 217.09         | 500            | 475.95         | 7.4937         | 16.1899        | 286.31         | 417.47         | 0.1506         | 4014.266         | 0.2593         | 7.4748         | 250            | 0.8780         |
| 37    | 163.92         | 403.8          | 446.84         | 6.2278         | 18.9241        | 341.25         | 325.57         | 0.2722         | 3450.967         | 0.4332         | 7.4748         | 330            | 0.7893         |
| 38    | 242.41         | 451.9          | 486.08         | 7.443          | 10.7215        | 371.38         | 191.9          | 0.2924         | 3914.552         | 0.1936         | 6.6667         | 210            | 0.8823         |
| 39    | 200.63         | 496.2          | 432.91         | 6.481          | 22.8734        | 256.19         | 375.7          | 0.2418         | 3679.468         | 0.4534         | 6.8687         | 413            | 0.7928         |

|    |        |        |        |        |         |        |        |        |          |        |         |     |        |
|----|--------|--------|--------|--------|---------|--------|--------|--------|----------|--------|---------|-----|--------|
| 40 | 250    | 472.15 | 407.59 | 6.6329 | 18.0127 | 373.15 | 308.86 | 0.343  | 4119.411 | 0.3044 | 6.8687  | 353 | 1.0009 |
| 41 | 244.94 | 402.53 | 427.85 | 7.2658 | 15.8861 | 270.37 | 300.51 | 0.2215 | 4528.199 | 0.2052 | 7.8788  | 225 | 0.8644 |
| 42 | 196.84 | 491.14 | 436.71 | 6      | 1.9114  | 293.4  | 467.59 | 0.3127 | 3246.639 | 0.0511 | 5.8586  | 46  | 0.8578 |
| 43 | 151.27 | 441.77 | 477.22 | 6.5063 | 11.3291 | 272.14 | 141.77 | 0.1608 | 3344.963 | 0.2621 | 7.4748  | 186 | 0.5730 |
| 44 | 219.62 | 413.92 | 434.18 | 7.0633 | 8.8987  | 346.57 | 501.01 | 0.1051 | 4260.086 | 0.1248 | 7.8788  | 121 | 0.9830 |
| 45 | 203.16 | 493.67 | 497.47 | 6.3291 | 11.9367 | 366.06 | 425.82 | 0.2316 | 2957.817 | 0.3678 | 5.2525  | 342 | 0.9461 |
| 46 | 227.22 | 487.34 | 445.57 | 6.7342 | 11.6329 | 247.33 | 734.94 | 0.3278 | 3739.509 | 0.2359 | 6.4647  | 245 | 0.8940 |
| 47 | 232.28 | 445.57 | 435.44 | 7.7215 | 22.2658 | 243.78 | 617.97 | 0.3684 | 4784.199 | 0.2833 | 8.6869  | 303 | 0.8847 |
| 48 | 233.54 | 405.06 | 487.34 | 7.1899 | 7.6835  | 339.48 | 567.85 | 0.4342 | 3791.702 | 0.1671 | 6.6667  | 179 | 1.0201 |
| 49 | 205.7  | 434.18 | 469.62 | 6.4304 | 2.519   | 259.73 | 434.18 | 0.1304 | 3331.132 | 0.0586 | 6.0302  | 53  | 0.8237 |
| 50 | 186.71 | 415.19 | 448.1  | 6.1013 | 12.5443 | 307.58 | 751.65 | 0.2823 | 3304.914 | 0.3163 | 6.4647  | 266 | 0.8973 |
| 51 | 175.32 | 407.59 | 437.97 | 7.8228 | 6.4684  | 325.3  | 701.52 | 0.3835 | 4959.940 | 0.0774 | 11.1158 | 63  | 0.8864 |
| 52 | 215.82 | 417.72 | 439.24 | 6.1266 | 3.7342  | 343.02 | 292.15 | 0.3329 | 3389.984 | 0.0928 | 5.8598  | 91  | 0.8893 |
| 53 | 246.2  | 426.58 | 441.77 | 7.038  | 1.6076  | 277.45 | 333.92 | 0.4291 | 4104.419 | 0.0296 | 7.0707  | 34  | 0.8919 |
| 54 | 168.99 | 435.44 | 500    | 7.5949 | 10.1139 | 304.04 | 592.91 | 0.2671 | 3975.415 | 0.1734 | 8.8889  | 129 | 0.8302 |
| 55 | 214.56 | 482.28 | 430.38 | 6.3544 | 19.8354 | 312.9  | 760    | 0.1152 | 3604.122 | 0.3913 | 6.4647  | 382 | 0.9704 |
| 56 | 189.24 | 410.13 | 470.89 | 7.3165 | 18.3165 | 242.01 | 183.54 | 0.3481 | 4081.733 | 0.3152 | 8.3674  | 274 | 0.6567 |
| 57 | 190.51 | 406.33 | 460.76 | 8      | 12.2405 | 330.62 | 258.73 | 0.3228 | 4799.958 | 0.1489 | 10.0993 | 126 | 0.8032 |
| 58 | 156.33 | 488.61 | 472.15 | 6.0506 | 16.7975 | 302.26 | 225.32 | 0.3734 | 2989.252 | 0.5549 | 6.2626  | 438 | 0.6817 |
| 59 | 234.81 | 458.23 | 459.49 | 7.7975 | 18.6203 | 252.64 | 116.71 | 0.2468 | 4505.201 | 0.2459 | 8.1633  | 267 | 0.6563 |
| 60 | 161.39 | 469.62 | 453.16 | 7.0127 | 1       | 300.49 | 659.75 | 0.181  | 3952.535 | 0.0166 | 8.8889  | 12  | 0.8157 |
| 61 | 236.08 | 437.97 | 464.56 | 6.3038 | 17.4051 | 332.39 | 166.84 | 0.1456 | 3255.428 | 0.4269 | 5.2525  | 469 | 0.8052 |
| 62 | 239.87 | 416.46 | 498.73 | 7.2152 | 12.8481 | 282.77 | 350.63 | 0.1405 | 3680.391 | 0.2450 | 6.2626  | 262 | 0.8944 |
| 63 | 174.05 | 429.11 | 413.92 | 7.3418 | 14.0633 | 344.8  | 133.42 | 0.5    | 4818.338 | 0.2026 | 10.5051 | 184 | 0.6557 |
| 64 | 231.01 | 479.75 | 468.35 | 6.8608 | 17.7089 | 360.74 | 676.46 | 0.4139 | 3606.310 | 0.4173 | 6.2626  | 434 | 1.0623 |
| 65 | 248.73 | 464.56 | 420.25 | 6.7848 | 8.2911  | 268.59 | 250.38 | 0.1101 | 4098.008 | 0.1261 | 6.8687  | 139 | 0.8394 |
| 66 | 228.48 | 486.08 | 465.82 | 7.9494 | 23.481  | 321.76 | 358.99 | 0.4089 | 4519.534 | 0.3479 | 8.2828  | 345 | 0.9250 |
| 67 | 160.13 | 477.22 | 401.27 | 6.4051 | 14.6709 | 323.53 | 158.48 | 0.2772 | 4054.463 | 0.2430 | 9.0909  | 177 | 0.6474 |
| 68 | 204.43 | 474.68 | 408.86 | 6.557  | 20.1392 | 311.12 | 626.33 | 0.4595 | 4062.830 | 0.3904 | 7.6768  | 342 | 0.9278 |
| 69 | 241.14 | 439.24 | 458.23 | 7.3924 | 23.1772 | 327.07 | 584.56 | 0.1861 | 4198.322 | 0.3434 | 7.2727  | 372 | 1.0229 |
| 70 | 155.06 | 456.96 | 411.39 | 7.6709 | 2.2152  | 288.09 | 409.11 | 0.4392 | 5163.405 | 0.0258 | 12.3232 | 17  | 0.7419 |
| 71 | 224.68 | 494.94 | 482.28 | 7.7722 | 2.8228  | 281    | 643.04 | 0.3886 | 4167.537 | 0.0483 | 7.6768  | 48  | 0.9720 |
| 72 | 179.11 | 453.16 | 479.75 | 7.0886 | 21.6582 | 350.11 | 100    | 0.2266 | 3740.816 | 0.4113 | 7.8788  | 357 | 0.6071 |
| 73 | 191.77 | 444.3  | 491.14 | 6.4557 | 21.3544 | 291.63 | 526.08 | 0.1709 | 3161.939 | 0.5581 | 6.0606  | 508 | 0.8567 |
| 74 | 162.66 | 400    | 450.63 | 7.4684 | 9.8101  | 238.47 | 576.2  | 0.1354 | 4488.919 | 0.1244 | 10.3030 | 90  | 0.7282 |
| 75 | 209.49 | 450.63 | 493.67 | 7.6962 | 7.3797  | 289.86 | 283.8  | 0.4544 | 4061.957 | 0.1425 | 7.8788  | 142 | 0.8140 |
| 76 | 210.76 | 443.04 | 421.52 | 6.5823 | 25      | 284.54 | 125.06 | 0.3987 | 3951.531 | 0.4810 | 7.2727  | 480 | 0.6619 |
| 77 | 237.34 | 459.49 | 492.41 | 6.7595 | 5.557   | 319.99 | 726.58 | 0.2063 | 3327.546 | 0.1334 | 5.4546  | 140 | 1.0270 |
| 78 | 172.78 | 412.66 | 455.7  | 7.7468 | 19.5316 | 357.2  | 601.27 | 0.1557 | 4640.429 | 0.2331 | 10.3030 | 180 | 0.9033 |
| 79 | 177.85 | 432.91 | 494.94 | 6.6582 | 4.9494  | 369.61 | 559.49 | 0.1    | 3304.923 | 0.1157 | 6.6667  | 93  | 0.9225 |
| 80 | 193.04 | 446.84 | 456.96 | 7.8481 | 6.1646  | 273.91 | 267.09 | 0.1203 | 4634.633 | 0.0731 | 19.7980 | 62  | 0.7549 |
